# Supplementary material for: Ordered multilayer films of hollow sphere aluminium-doped zinc oxide for photoelectrochemical solar energy conversion
Source: Royal Society of Chemistry journal article supplement (doi:10.1039/c7ta07509j), 2017-01-01
Supplement: c7ta07509j1.pdf [file c7ta07509j1.pdf]

**Ordered multilayer films of hollow sphere aluminium-doped zinc oxide for photoelectrochemical solar energy conversion**

*Menglong Zhang, Robert W. Mitchell, Haowei Huang, Richard E. Douthwaite\**

Department of Chemistry, University of York, Heslington, York, YO10 5DD (UK).

\*E-mail: richard.douthwaite@york.ac.uk

**Electronic Supporting Information**

Table of Contents

|                                    | Page |
|------------------------------------|------|
| 1. SEM .....                       | 2    |
| 2. Powder X-ray Diffraction .....  | 3    |
| 3. Transmission Spectroscopy ..... | 4    |
| 5. Photoelectrochemistry .....     | 6    |

## 1. SEM

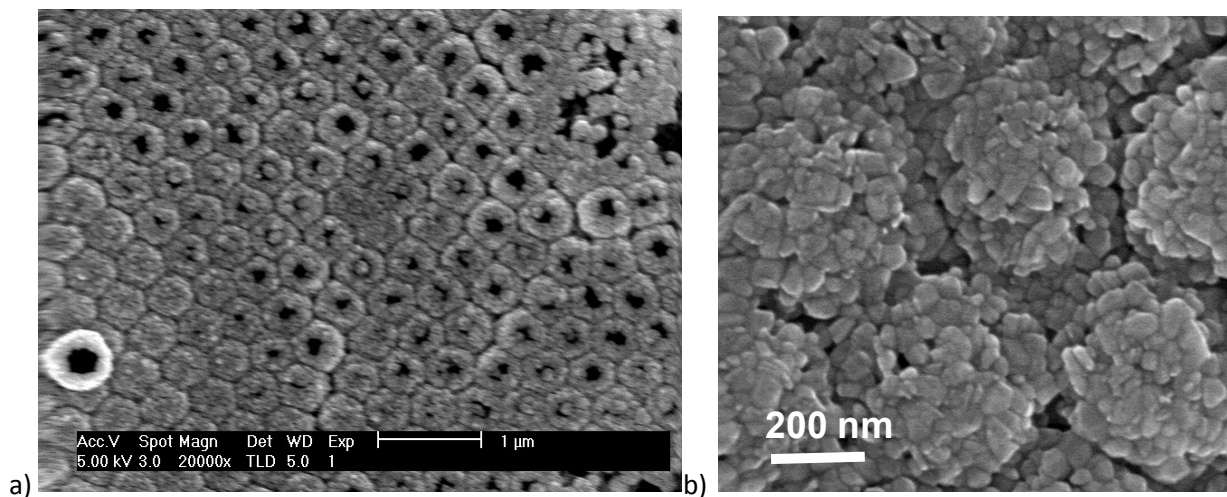

Fig. S1. a) SEM of hs-AZO; b) SEM of AZO from soaking the polystyrene template for 45 mins leading to incomplete sphere formation.

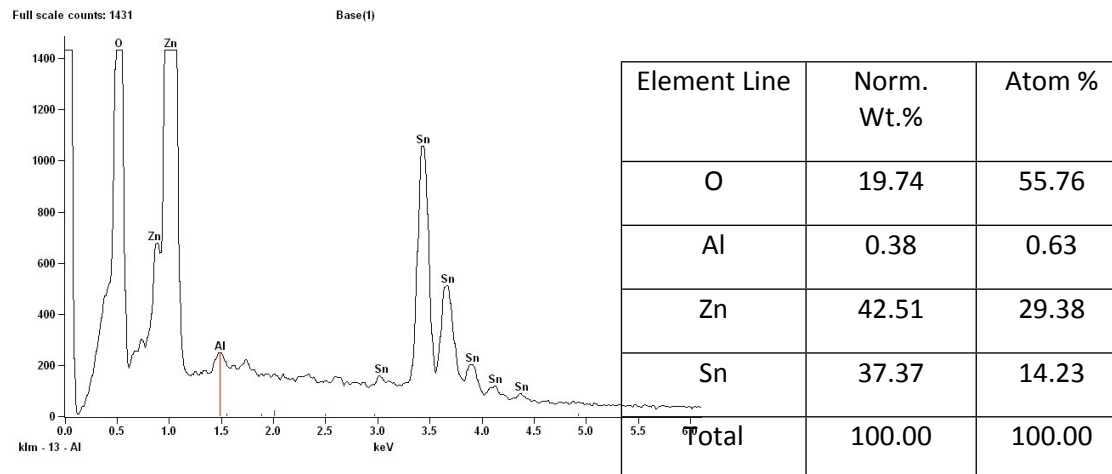

Fig. S2. EDX spectra (in SEM) of an hs-AZO electrode. Based on the ratio of ZnO:Al gives an Al doping of 1.0 at%.

## 2. Powder X-ray Diffraction

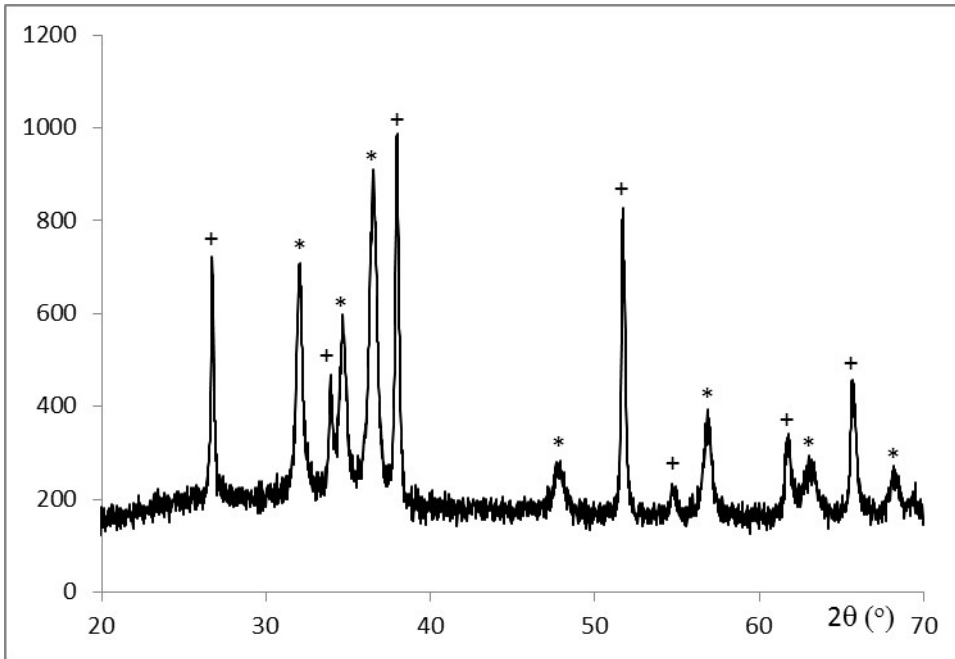

Fig. S3. hs-AZO on FTO substrate, \* = ZnO JCPDS 36-1451, + = SnO<sub>2</sub>, JCPDS 41-1445.

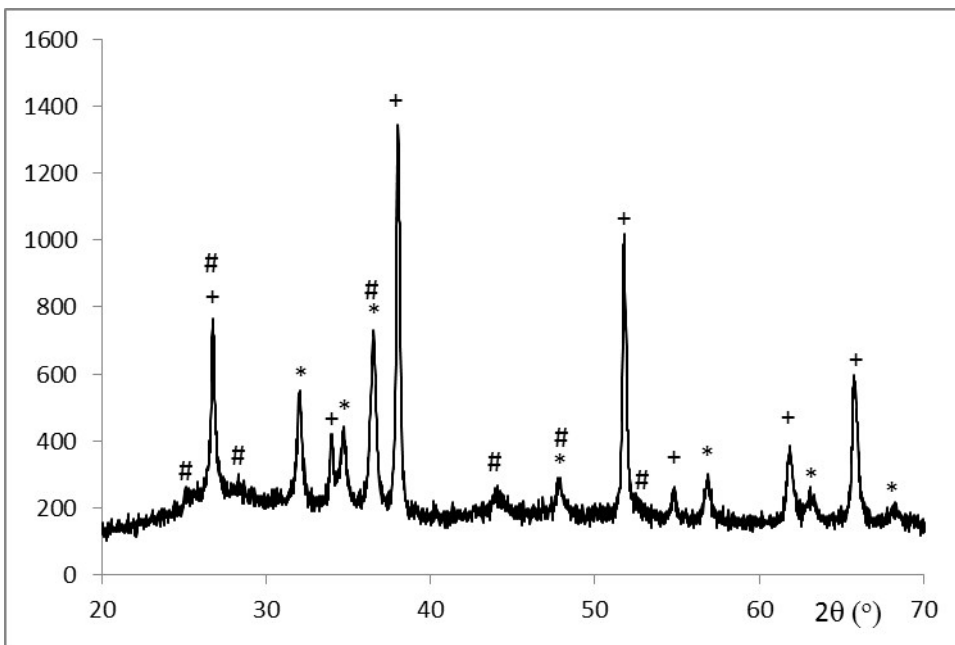

Fig. S4. CdS@hs-AZO on FTO substrate, \* = ZnO JCPDS 36-1451, + = SnO<sub>2</sub>, JCPDS 41-1445, # = CdS, JCPDS 01-075-1545.

### 3. Transmission Spectroscopy

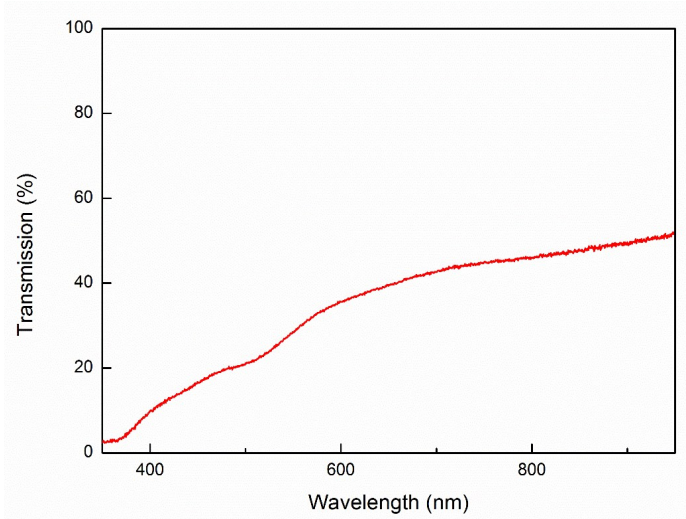

Fig. S5: UV-vis transmission spectra of hs-AZO film.

#### 4. TEM

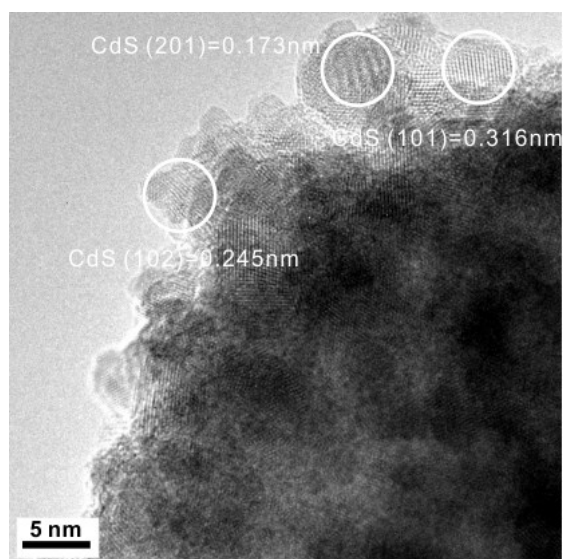

Fig. S6. Additional TEM of CdS@hs-AZO showing CdS particles on surface of hs-AZO.

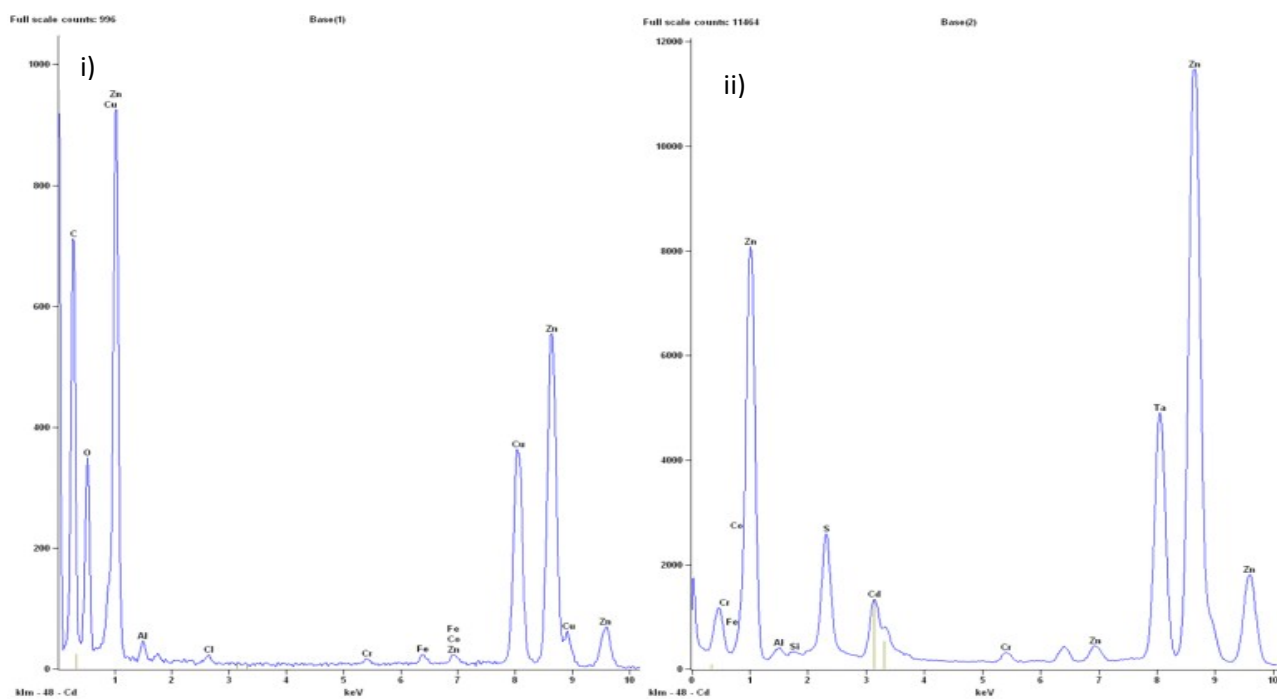

Fig. S7. EDX spectra (in TEM) of i) hs-AZO and ii) CdS@hs-AZO fragments scraped from an electrode.

## 5. Photoelectrochemistry

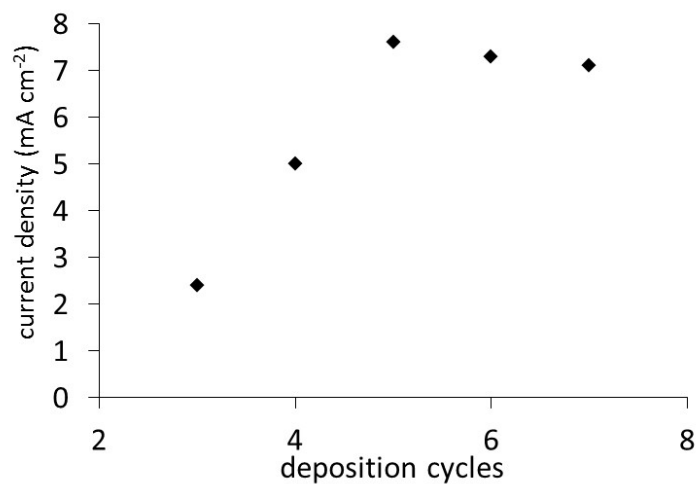

Fig. S8. Current density as a function of deposition cycles.

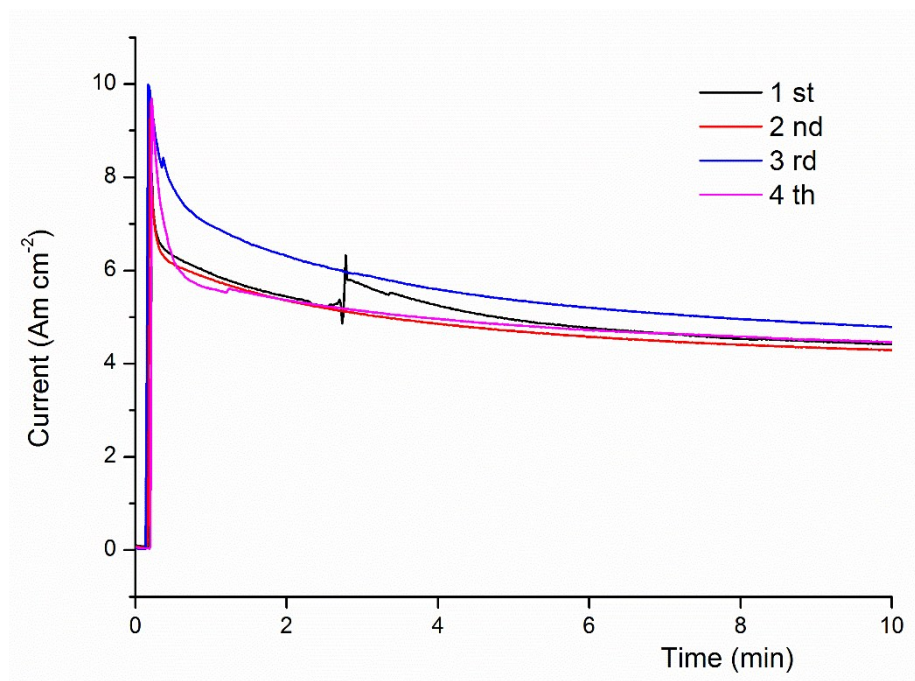

Fig. S9 Photostability of CdS@hs-AZO at 0 V vs Ag/AgCl, 100 mWcm<sup>-2</sup> in Na<sub>2</sub>S/Na<sub>2</sub>SO<sub>3</sub> (0.25/0.35 M). After each experiment 1-4 the electrode was soaked in the electrolyte for 5 mins to re-establish the initial photocurrent.
